# Supplementary figures and images for: Genomic and Ancestral Variation Underlies the Severity of COVID-19 Clinical Manifestation in Individuals of European Descent
Source: MDPI journal article supplement (doi:10.3390/life11090921), 2021-09-05

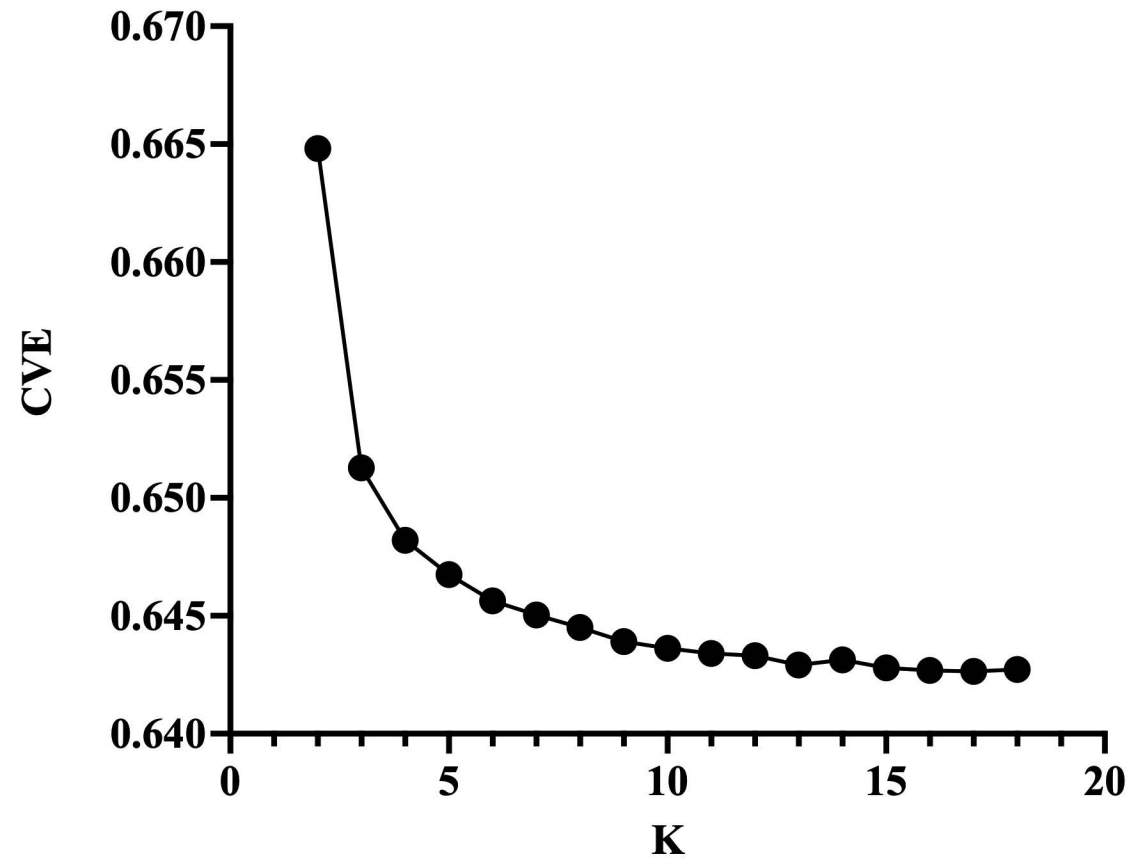

Supplement: s1 [file s1]

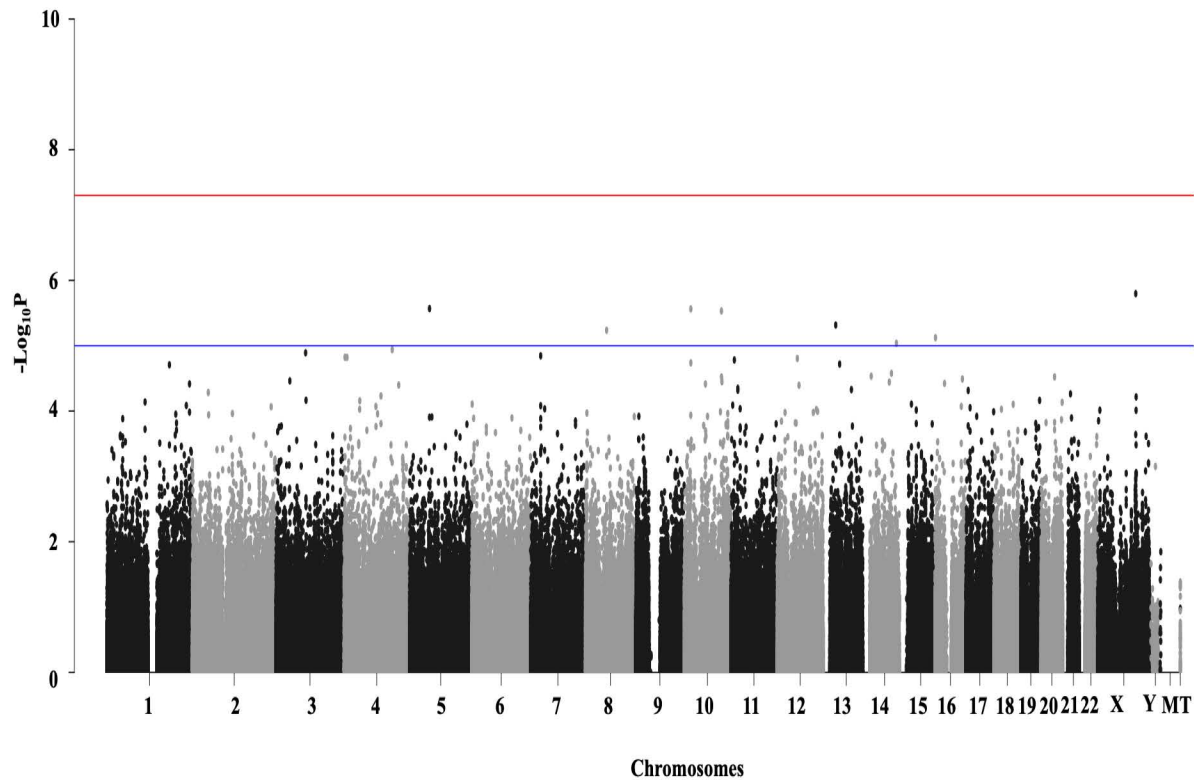

Supplement: s1 [file s1]
